# Supplementary material
Source: PubMed Central journal article supplement (PMC9011450)
Supplement: ADMT-7-0-s003.pdf [file ADMT-7-0-s003.pdf]

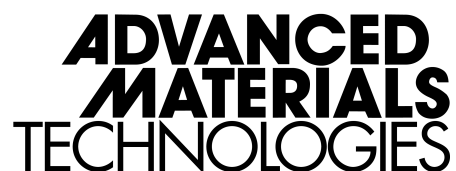

## Supporting Information

for *Adv. Mater. Technol.*, DOI: 10.1002/admt.202101013

Point-of-Care Platform for Rapid Multiplexed Detection of SARS-CoV-2 Variants and Respiratory Pathogens

*Alexander Y. Trick, Fan-En Chen, Liben Chen,\* Pei-Wei Lee, Alexander C. Hasnain, Heba H. Mostafa, Karen C. Carroll, and Tza-Huei Wang\**

Supporting Information

**Point-of-care platform for rapid multiplexed detection of SARS-CoV-2 variants and respiratory pathogens**

*Alexander Y. Trick, Fan-En Chen, Liben Chen\*, Pei-Wei Lee, Alexander C. Hasnain, Heba H. Mostafa, Karen C. Carroll, Tza-Huei Wang\**

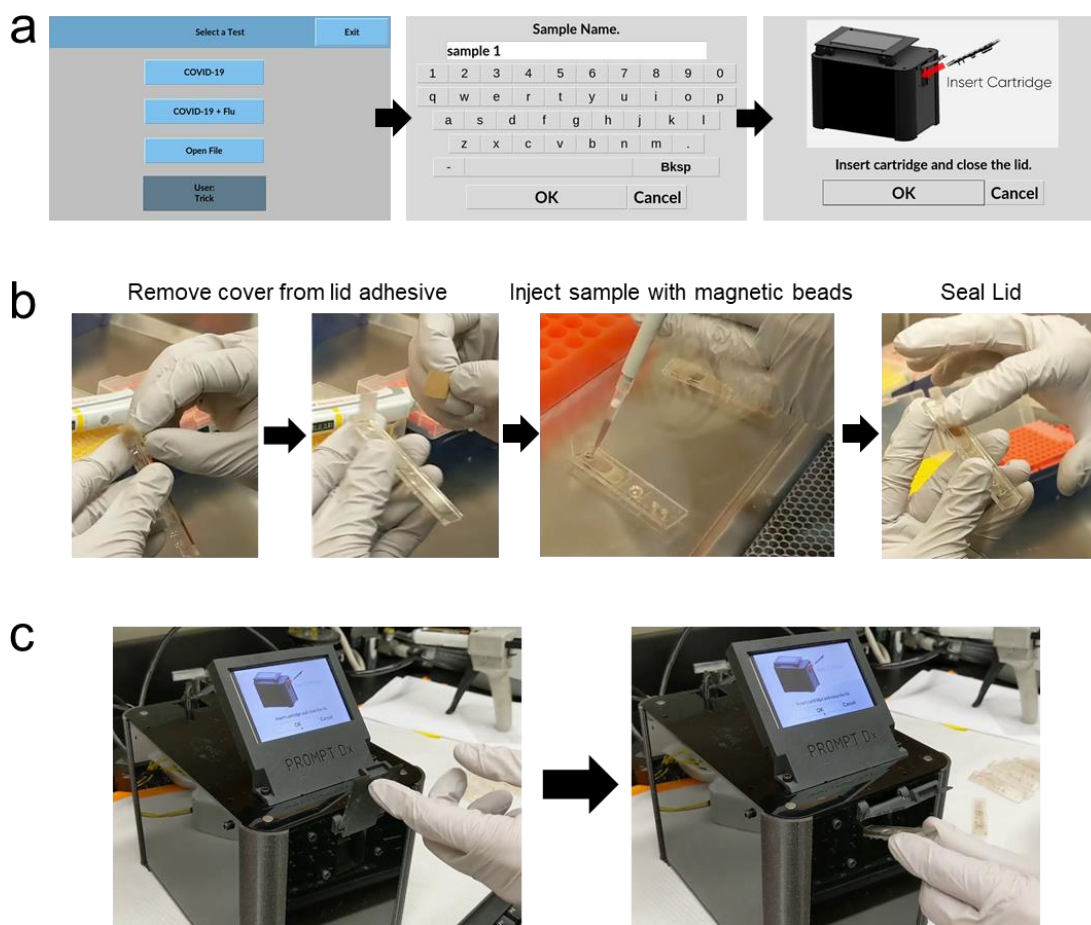

### Figure S1. Loading cartridges and instrument operation

(a) Graphic user interface for assay selection, entry of sample name, and confirmation of cartridge insertion into the instrument. (b) To load the cartridge, first the paper cover is removed from the lid to expose a pressure-sensitive adhesive. Then the sample is mixed with magnetic beads and pipetted into the cartridge port followed by sealing the cartridge port with the adhesive lid. (c) The cartridge is inserted into the instrument slot PCR wells first. Once the user presses "OK" on the touchscreen, the instrument verifies the proper positioning of the cartridge wells, mounts the heat blocks, and initiates sample preparation and RT-PCR.

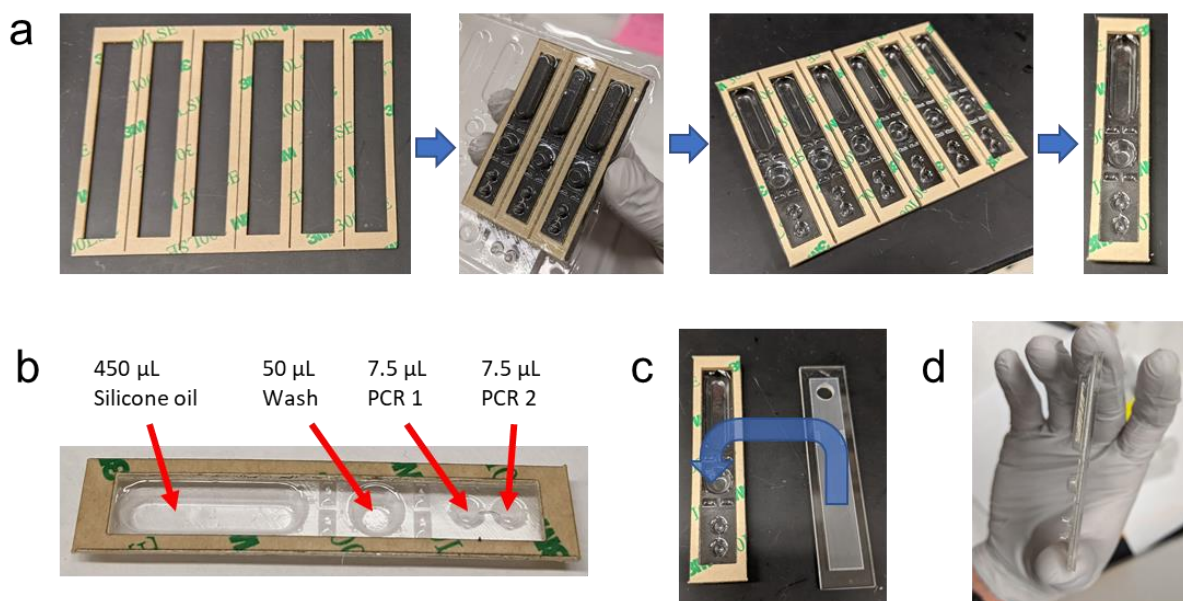

### Figure S2. Cartridge assembly

**(a)** The middle section of the cartridge is a laser-cut spacer acrylic with pressure sensitive adhesive laminated to both sides. One side of the adhesive cover is removed and 3D-printed alignment mold presses the spacer into the thermoformed wells. Each thermoform contains a row of 6 cartridges which are individually cut out prior to reagent loading. **(b)** With the spacer section in place, silicone oil, wash buffer, and PCR buffers are dispensed directly into the thermoformed wells. **(c)** A top layer with laser-patterned Teflon tape and a laser-cut sample port seals the cartridge using the top layer of pressure sensitive adhesive on the spacer. **(d)** The cartridge is tilted to allow silicone oil to flow over the other reagent wells followed by dispensing of molten wax to plug the oil.

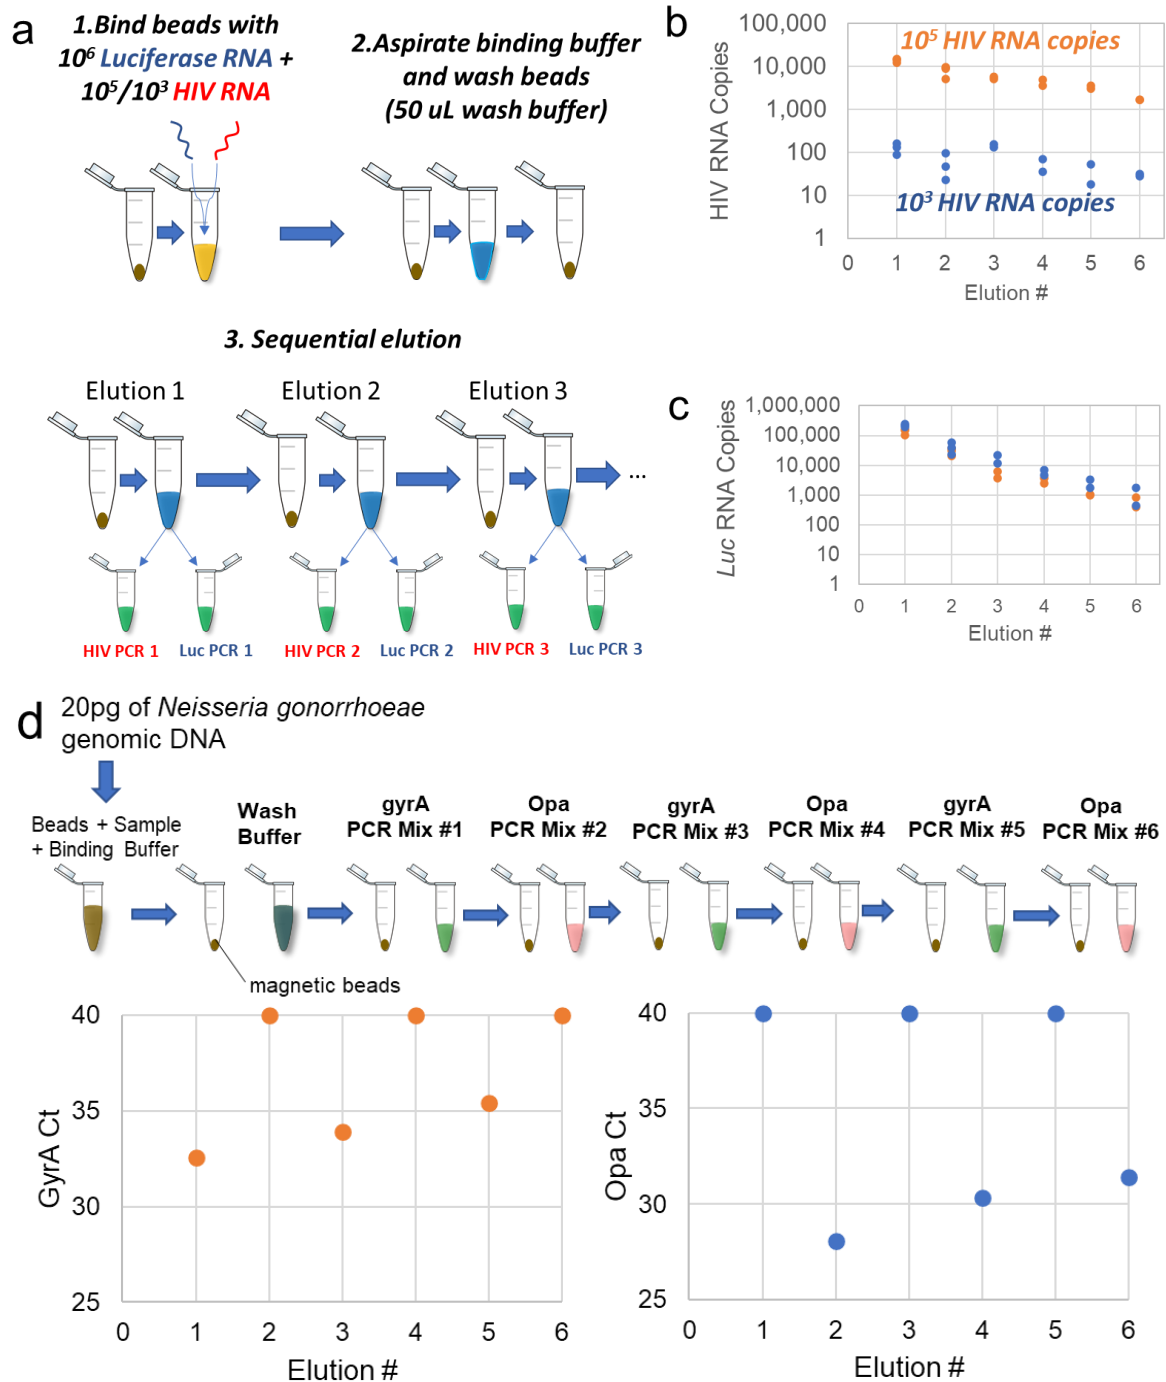

**Figure S3. Nucleic acid aliquoting with sequential elution.**

(a) To evaluate higher levels of potential multiplexing through sequential elution, 4  $\mu$ L ChargeSwitch beads were mixed with 10  $\mu$ L ChargeSwitch binding buffer and 20  $\mu$ L target containing  $10^6$  copies of synthetic luciferase control RNA (L4561, Promega) with either  $10^5$  or  $10^3$  copies of synthetic HIV RNA (VR-3245SD ATCC). Beads were magnetically pelleted and the supernatant was aspirated and replaced with 50  $\mu$ L ChargeSwitch wash buffer. After washing the beads, they were sequentially pelleted and resuspended into 10  $\mu$ L ChargeSwitch elution buffer for a total of 6 elution steps. From each eluate, 1  $\mu$ L was mixed into PCR assays for either amplification of HIV or luciferase (Luc) RNA. These assays contained 1X lyo-ready qPCR mix (Meridian Bioscience), 0.25 U PrimeScript RT enzyme (Takara Bio), 0.3

$\mu\text{M}$  forward and reverse primers, and  $0.25 \mu\text{M}$  probe (Table S4). Conditions for the first two elution steps were run in triplicate with duplicates for elution steps 3-6. **(b)** HIV RNA recovery was calculated for each of the 6 elution steps for tubes containing both  $10^5$  and  $10^3$  copies as the initial input. HIV RNA was successfully detected in all eluates with a steady decreasing trend as the number of elutions increased. **(c)** Luciferase RNA was also detected for all conditions with a trend that showed little deviation with either starting concentration of HIV target. **(d)** *Neisseria gonorrhoeae* genomic DNA and two *Neisseria gonorrhoeae* PCR assays targeting its *gyrA* gene and *Opa* gene were used to assess potential cross-contamination between each step of the sequential elution. The sequential elution was performed six times with alternating two PCR assays. No amplifications ( $C_t=40$ ) were observed at the 2nd, 4th, and 6th elution steps for *GyrA*, or the 1st, 3rd, and 5th elution steps for *Opa*, indicating no measurable contamination caused by carry-over primer/probes during the sequential elution.

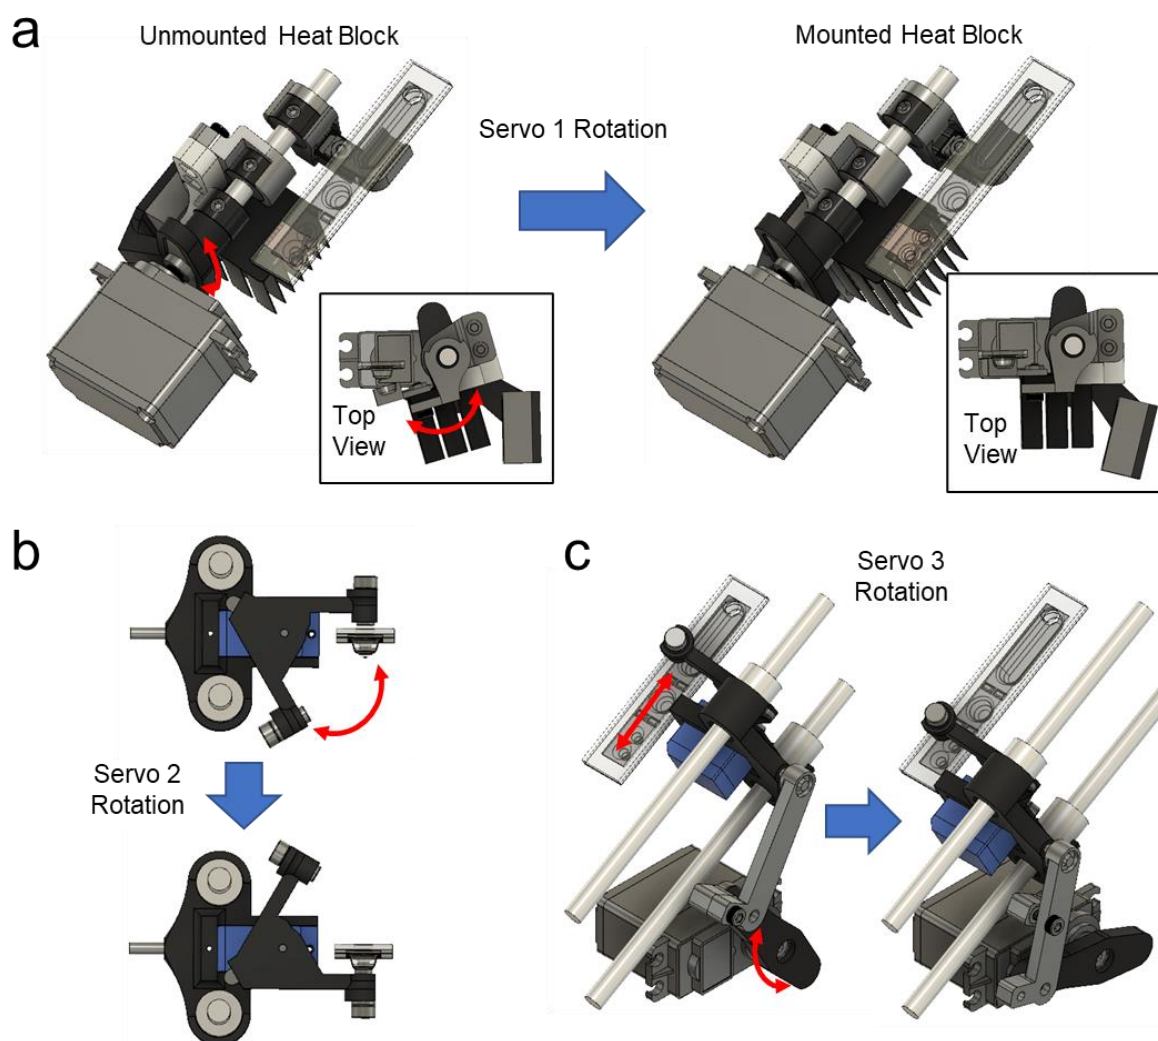

**Figure S4. Servo actuation for cartridge mounting and magnetic transfer.**

(a) After insertion of the cartridge, the first servo rotates to mount the heat blocks onto the PCR and sample wells. (b) Rotation of the second servo allows for transfer of magnetic beads into and out of cartridge wells. Here the rotation is shown pulling the beads from the planar PTFE-coated inner surface of the cartridge down into the reagent well. (c) The third servo is connected to lever arms that actuate the second servo along a linear axis while the beads are captured on the PTFE inner surface to transfer the beads between wells.

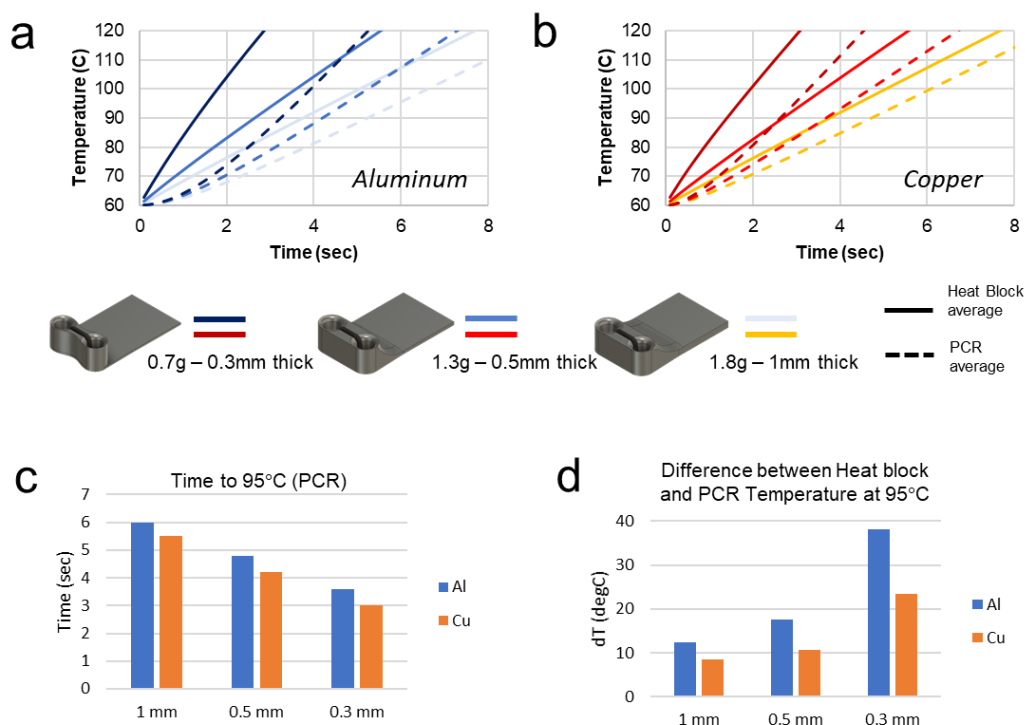

**Figure S5. Heat block simulation and design for rapid thermocycling.**

Transient heat transfer simulations were conducted in Solidworks 2019 using 3 different heat block models made from aluminum (a) or copper (b) with varying thickness. 7W constant heat power was supplied to the heat block in the rectangular section where the thermoelectric element would make contact. Average temperature for the heat block (solid lines) and 10  $\mu\text{L}$  volumes of “PCR” (water) within each well (dashed lines) was tracked over 8 seconds. Reducing the thickness of the heat block resulted in faster heating, but larger differences between the heat block and PCR temperature. Copper’s better thermal conductivity reduced the gradient between heat block temperature and PCR compared to aluminum. (c) Comparison of time for the PCR to reach 95°C from 60°C starting temperature given the 7W constant heating in varying thickness copper (Cu) or aluminum (Al) heat blocks. (d) Temperature difference between heat block and PCR when PCR first reaches 95°C indicates copper reduces the temperature gradient and requires less time to transfer heat from the thermoelectric to the PCR.



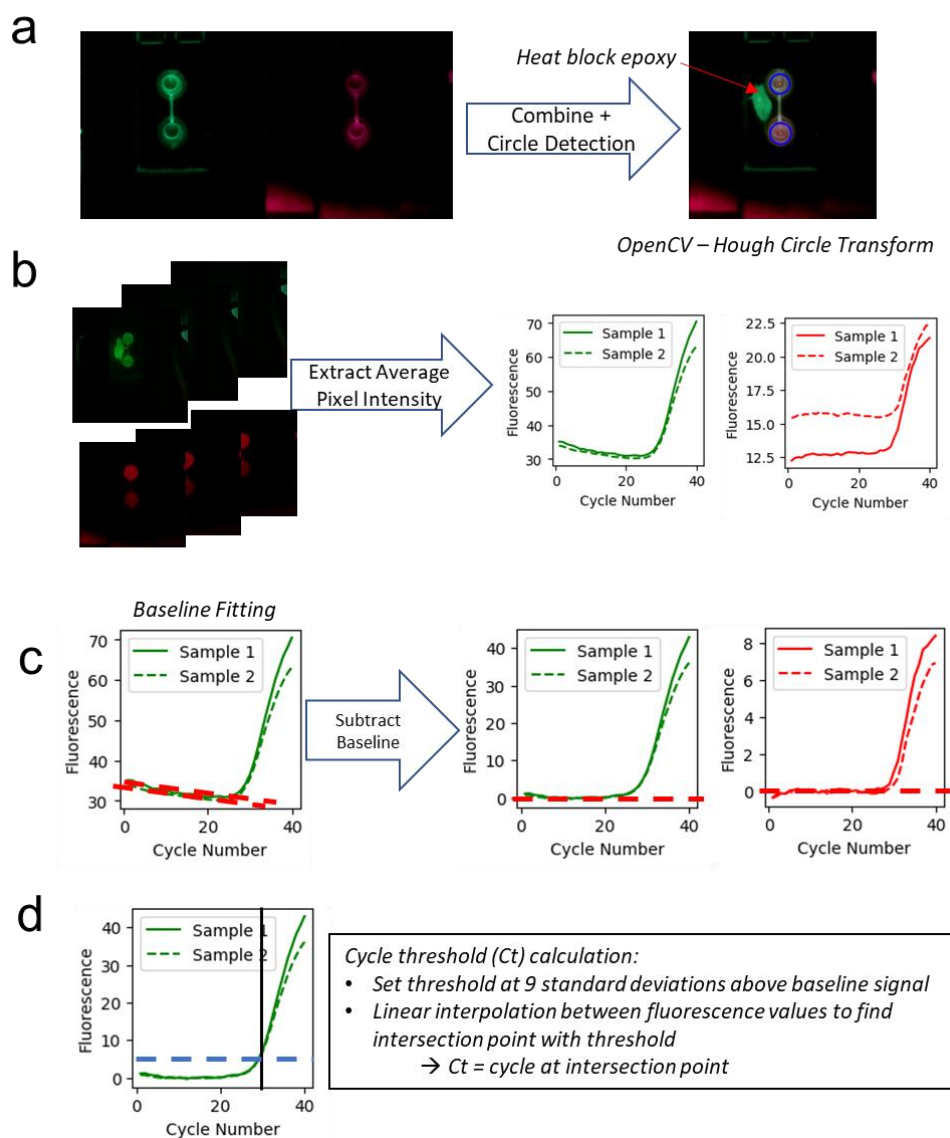

**Figure S6. Fluorescence processing algorithm.**

(a) The cartridge is first imaged upon insertion to verify its position using the python OpenCV Hough Transform to detect circles. Images are taken in both the red and green channels and combined. If the circles are within a threshold distance of the calibrated cartridge position, then the heat block is mounted (evident by the fluorescent epoxy used to hold the thermistor to the heat block) and the circles are redetected after mounting. (b) The detected circles are used to mask the images and extract the fluorescence for each individual well by averaging the pixel intensity. This results in the raw RT-PCR fluorescence curves. (c) Fluorescence curves are baseline corrected by fitting the baseline with a linear regression curve and subtracting the resulting line from the whole set of points for each well and fluorescence channel. (d) The baseline subtracted data is then used to calculate the cycle threshold ( $C_t$ ) values for each curve using 9 standard deviations above the average fluorescence of the baseline as the threshold and interpolating the cycle and fluorescence data to find the cycle for the intersection point.

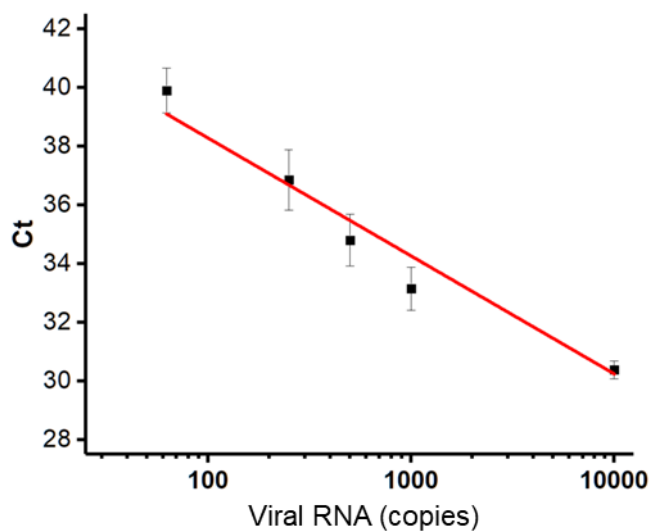

**Figure S7. Detection of SARS-CoV-2 in saliva.**

A serial dilution of known concentrations of gamma-irradiated viruses were spiked in pooled passive drool saliva samples ( $n = 4$ ) collected from healthy donors. Five  $\mu\text{L}$  of each spiked saliva sample was mixed with 50  $\mu\text{L}$  of magnetic bead buffer supplemented with thermo-labile proteinase K. The entire sample mix was then loaded into the cartridge for detection. The limit of detection was determined as 62.5 copies per 5  $\mu\text{L}$  saliva input or 12.5 copies/ $\mu\text{L}$ , the lowest concentration of which at least three replicates were detected positive.

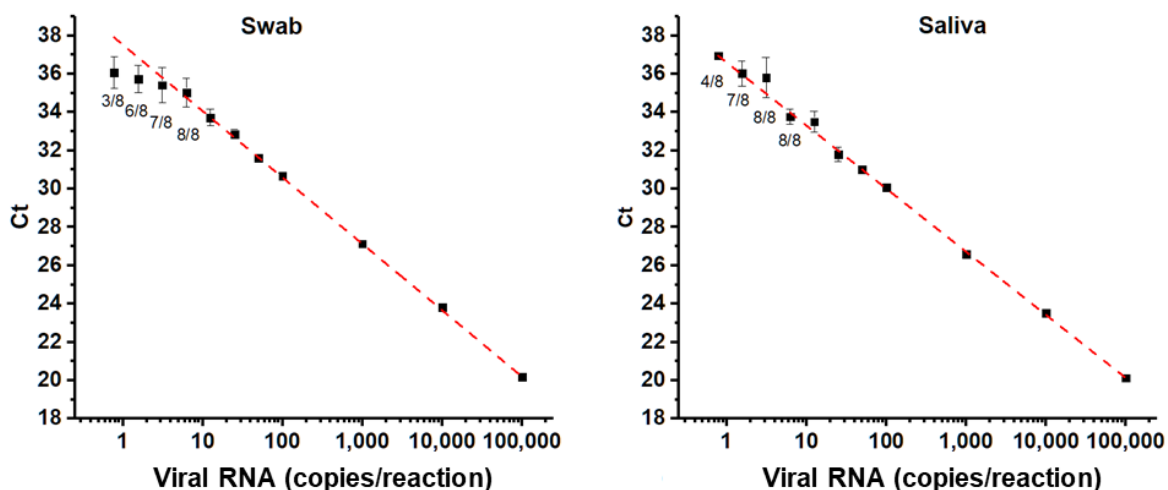

**Figure S8. Comparator assay evaluation**

Using the modified CDC protocol, we were able to detect 3 copies/ $\mu\text{L}$  of gamma-irradiated SARS-CoVID-2 viruses in swab eluate and 1.5 copies/ $\mu\text{L}$  in saliva. The labels in the graphs indicate detected positive rate of eight replicates at each concentration. We defined the limit of detection as positive results for at least 7 out of 8 repeats. Higher concentrations without number labels all tested positive (4 replicates). Red dashed lines represent linear regression.

**Table S1. Cartridge bill of materials**

| Component                            | Vendor             | Amount | Units                                    | Price/Unit                 | Total Price |
|--------------------------------------|--------------------|--------|------------------------------------------|----------------------------|-------------|
| SpeedSTAR DNA Polymerase             | Takara Bio         | 2.00   | U                                        | 0.89                       | 1.78        |
| AccuStart II Taq                     | QuantaBio          | 2.00   | U                                        | 0.23                       | 0.45        |
| QuantaBio ToughMix                   | QuantaBio          | 2.00   | reaction                                 | 0.34                       | 0.68        |
| Oligonucleotides (Primers)           | IDT                | 0.50   | $\mu\text{L}$ of 100 $\mu\text{M}$ stock | 0.06                       | 0.03        |
| Oligonucleotides (Probes)            | IDT                | 0.20   | $\mu\text{L}$ of 100 $\mu\text{M}$       | 0.80                       | 0.16        |
| Top Acrylic Sheet                    | Eplastics          | 0.00   | sheet                                    | 22.40                      | 0.03        |
| Middle Spacer Acrylic                | McMaster-Carr      | 0.01   | sheet                                    | 5.49                       | 0.05        |
| Thermoformed Wells                   | Welch Fluorocarbon | 0.04   | sheet                                    | 4.00                       | 0.14        |
| Silicone Oil                         | Thermofisher       | 0.42   | mL                                       | 0.37                       | 0.16        |
| Chargeswitch Kit (Wash, Bind, Beads) | Thermofisher       | 4.00   | $\mu\text{L}$ beads                      | 0.13                       | 0.53        |
| Teflon Tape                          | McMaster-Carr      | 0.05   | foot                                     | 2.11                       | 0.11        |
| 9472LE 3M Transfer Tape              | Uline              | 0.07   | foot                                     | 1.46                       | 0.10        |
| DEPC Water                           | N/A                | 3      | $\mu\text{L}$                            | negligible                 | 0.00        |
| Tween-20                             | Sigma-Aldrich      | 0.02   | $\mu\text{L}$                            | negligible                 | 0.00        |
|                                      |                    |        |                                          | <b>Price per cartridge</b> | <b>4.22</b> |

**Table S2. Instrument bill of materials**

| Category            | Part Description                             | Vendor                | Model                        | Qty   | Unit Price  | Cost       |
|---------------------|----------------------------------------------|-----------------------|------------------------------|-------|-------------|------------|
| Housing             | M3 Screws                                    | Amazon                | DYWISHKEY 360 Pieces         | 0.5   | \$11.69     | \$5.85     |
| Optics              | Raspberry Picamera                           | Amazon                | NoIR V2 8MP                  | 1     | \$23.99     | \$23.99    |
| Electronics         | Arduino Nano (Elegoo)                        | Amazon                | ELEGOO Nano pack of 3        | 0.333 | \$19.98     | \$6.65     |
| Electronics         | Touchscreen                                  | Amazon                | ELECROW 800x480 Touch Screen | 1     | \$49.99     | \$49.99    |
| Electronics         | HDMI Cables                                  | Amazon                | Cable Matters 3-pack         | 0.33  | \$12.99     | \$4.33     |
| Electronics         | USB Cables                                   | Amazon                | Sabrent 1ft - pack of 6      | 0.16  | \$7.98      | \$1.33     |
| Electronics         | Power Supply Cord                            | Amazon                | 6'                           | 1     | \$7.42      | \$7.42     |
| Electronics         | 24 AWG stranded wire                         | Amazon                | Silicone wire 24awg          | 0.01  | \$16.99     | \$0.17     |
| Motors              | Linear Ball Bearing                          | Amazon                | LM6UU - 12 pieces            | 0.25  | \$7.99      | \$2.00     |
| Motors              | uxcell Ball Bearing                          | Amazon                | ABEC-3                       | 1     | \$8.89      | \$8.89     |
| Electronics         | Raspberry Pi 3B+                             | Canakit               | 3B+                          | 1     | \$35.00     | \$35.00    |
| Optics              | Excitation Filter                            | Chroma                | 59003m                       | 1     | \$350       | \$350.00   |
| Electronics         | MCP3008                                      | Digikey               | MCP3008-I/P                  | 1     | \$2.19      | \$2.19     |
| Motors              | Sub Micro Servo                              | Digikey               | SG51R                        | 1     | \$5.95      | \$5.95     |
| Temperature Control | 5 Ohm Power Resistor                         | Digikey               | PF1262-5RF1                  | 1     | \$2.64      | \$2.64     |
| Housing             | 3D-printed Fixtures                          | Formlabs              | Black Resin 1L               | 0.2   | \$149       | \$29.80    |
| Electronics         | Custom PCB                                   | JLPCB                 | Y6-2808702A                  | 0.2   | \$19.55     | \$3.91     |
| Magnets             | Magnets - 3/16" x 1/4"                       | K&J Magnetics         | D34-N52                      | 2     | \$0.47      | \$0.94     |
| Magnets             | Magnets - 1/4" x 1/8"                        | K&J Magnetics         | D42-N52                      | 6     | \$0.43      | \$2.58     |
| Electronics         | BuckPuck                                     | LuxeonStarLEDs        | 3021-D-E-350                 | 2     | \$9.02      | \$18.04    |
| Temperature Control | 25 mm heatsink                               | LuxeonStarLEDs        | 25x25mm                      | 1     | \$5.34      | \$5.34     |
| Housing             | Black Cast Acrylic Sheet                     | McMaster              | 12"x24"x1/8"                 | 1     | \$14.27     | \$14.27    |
| Motors              | 1/8" Aluminum Rod                            | McMaster              | 3ft                          | 0.2   | \$10.88     | \$2.18     |
| Motors              | 6 mm Aluminum Rod                            | McMaster              | 3ft                          | 0.333 | \$24.59     | \$8.19     |
| Motors              | 6mm set screw collar                         | McMaster              |                              | 3     | \$2.11      | \$6.33     |
| Temperature Control | Easy-to-Machine 145 Copper Bar               | McMaster              | 1/4"x2"x1ft                  | 0.04  | \$38.43     | \$1.60     |
| Electronics         | Power Supply 7.5V 6A                         | Mouser                | MEAN WELL GST60A07-P1J       | 1     | \$19.30     | \$19.30    |
| Temperature Control | 100kOhm Thermistor                           | Mouser                | GA100K6MCD1                  | 2     | \$19.00     | \$38.00    |
| Optics              | Emission Filter                              | Omega                 | 535-700DBEM                  | 1     | \$300       | \$300.00   |
| Electronics         | Dual TB9051FTG Motor Driver for Raspberry Pi | Pololu                | 2761                         | 1     | \$21.95     | \$21.95    |
| Electronics         | 5V 5A Voltage Regulator                      | Pololu                | 2851                         | 1     | \$14.95     | \$14.95    |
| Motors              | HS485HB Servo motors                         | RobotShop             | HS-485HB                     | 2     | \$17.99     | \$35.98    |
| Optics              | Vollong 3W RGB High Power LED                | SuperBrightLEDs       | VL-H01RGB00302               | 1     | \$4.95      | \$4.95     |
| Temperature Control | TEC                                          | Custom Thermoelectric | 02301-9B30-32RU6A            | 1     | \$42.20     | \$42.20    |
|                     |                                              |                       |                              |       | Total Cost: | \$1,076.90 |

**Table S3. Specificity testing**

ND = no false-positive amplification detected

| <b>Organism</b>                   | <b>Source</b>          | <b>Concentration</b>                        | <b>Ct Value</b> |
|-----------------------------------|------------------------|---------------------------------------------|-----------------|
| Human coronavirus 229E            | Bei Resources NR-52726 | 3.64× 10 <sup>7</sup> genome equivalents/mL | ND              |
| Human coronavirus NL63            | Bei Resources NR-470   | 3.34× 10 <sup>7</sup> genome equivalents/mL | ND              |
| Respiratory syncytial virus       | Bei Resources NR-4052  | 136 ng/mL                                   | ND              |
| Human metapneumovirus             | Bei Resources NR-22227 | 258 ng/mL                                   | ND              |
| <i>Acinetobacter baumannii</i>    | ATCC 19606             | 10 <sup>9</sup> CFU/mL                      | ND              |
| <i>Enterococcus faecalis</i>      | ATCC 29212             | 10 <sup>9</sup> CFU/mL                      | ND              |
| <i>Enterococcus faecium</i>       | ATCC 35667             | 10 <sup>9</sup> CFU/mL                      | ND              |
| <i>Escherichia coli</i>           | ATCC 25922             | 10 <sup>9</sup> CFU/mL                      | ND              |
| <i>Klebsiella pneumoniae</i>      | ATCC BAA-1705          | 10 <sup>9</sup> CFU/mL                      | ND              |
| <i>Morganella morganii</i>        | ATCC 25830             | 10 <sup>9</sup> CFU/mL                      | ND              |
| <i>Mycobacterium tuberculosis</i> | ATCC 25177             | 10 <sup>9</sup> CFU/mL                      | ND              |
| <i>Staphylococcus aureus</i>      | ATCC 29213             | 10 <sup>9</sup> CFU/mL                      | ND              |
| <i>Streptococcus agalactiae</i>   | ATCC 13813             | 10 <sup>9</sup> CFU/mL                      | ND              |
| <i>Pseudomonas aeruginosa</i>     | ATCC 27853             | 10 <sup>9</sup> CFU/mL                      | ND              |

**Table S4. PCR assay primers and probes**

| Set name              | Primer/probe   | Sequence (5' → 3')                                  | Reference |
|-----------------------|----------------|-----------------------------------------------------|-----------|
| SARS-CoV-2 N1         | Forward primer | GACCCCAAATCAGCGAAAT                                 | 27        |
|                       | Reverse primer | TCTGGTACTGCCAGTTGAATCTG                             |           |
|                       | Probe          | /FAM/ACCCCGCAT/ZEN/TACGTTTGGTGGACC/IABkF            |           |
| Control RNA           | Forward primer | TACAACACCCCAACATCTTCGA                              | 26        |
|                       | Reverse primer | GGAAGTTCACCGGCGTCAT                                 |           |
|                       | Probe          | /5TYE665/CGGGCGTGGCAGGTCTTCCC/3IAbRQSp/             |           |
| Influenza A           | Forward primer | CTTCTAACCGAGGTGAAACGTA                              | 29        |
|                       | Reverse primer | GGTGACAGGATTGGTCTTGTCTTTA                           |           |
|                       | Probe          | /5TYE665/TCAGGCCCCCTCAAAGCCGAG/3IAbRQSp/            |           |
| Influenza B           | Forward primer | AAATACGGTGGATTAACAAAAGCAA                           | 28        |
|                       | Reverse primer | CCAGCAATAGCTCCGAAGAAA                               |           |
|                       | Probe          | /56-FAM/CACCCATATTGGGCAATTCCTATGGC/3IABkFQ          |           |
| Yale ORF1a Δ3675-3677 | Forward primer | TGCTTGCTAGTTGGGTGATG                                | 10        |
|                       | Reverse primer | TGCTGTCATAAGGATTAGTAACACT                           |           |
|                       | Probe          | /5Cy5/GTTTGTCTG/TAO/GTTTTAAGCTAAAAGACTGTG/3IAbRQSp  |           |
| Yale Spike Δ69-70     | Forward primer | TCAACTCAGGACTTGTCTTACCT                             | 10        |
|                       | Reverse primer | TGGTAGGACAGGGTTATCAAAC                              |           |
|                       | Probe          | /56-FAM/TTCCATGCT/ZEN/ATACATGTCTCTGGGA/3IABkFQ/     |           |
| HIV                   | Forward primer | CATGTTTTTCAGCATTATCAGAAGGA                          | 44        |
|                       | Reverse primer | TGCTTGATGTCCCCCACT                                  |           |
|                       | Probe          | /56-FAM/CCACCCAC/ZEN/AAGATTTAAACACCATGCTAA/3IABkFQ/ |           |

**Movie S1. On-cartridge sample processing**

**Data S1. Clinical samples data (separate file)**
